# Supplementary material for: Two-photon induced emissive thiophene donor–acceptor systems as molecular probes for in vitro bio-imaging: synthesis, crystal structure, and spectroscopic properties
Source: Royal Society of Chemistry journal article supplement (doi:10.1039/c3ra42914h), 2013-01-01
Supplement: c3ra42914h.pdf [file c3ra42914h.pdf]

# **Two-Photon Induced Emissive Thiophene Donor-Acceptor Systems as Molecular Probes in Vitro Bio-imaging: Synthesis, Crystal Structure and Spectroscopic Properties.**

## **Supporting information**

Cheuk-Fai Chow <sup>\*a</sup>

<sup>a</sup>Department of Science and Environmental Studies, The Hong Kong Institute of Education, 10 Lo Ping Road, Tai Po, New Territories, H.K. SAR, China.

E-mail: cfchow@ied.edu.hk; Fax: (+852) 29487676; Tel: (+852) 29487671

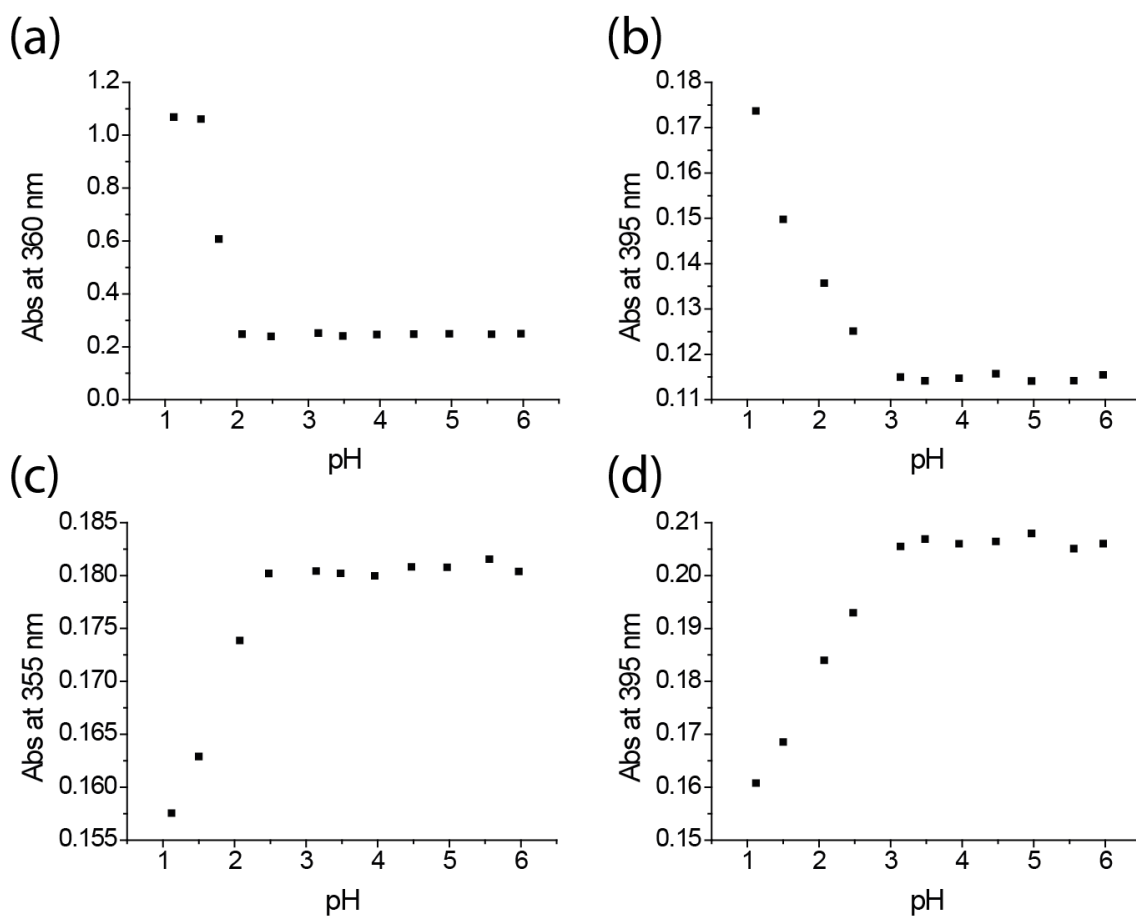

**S. Fig 1.** The absorbance taken at (a) 360 nm of **Bt**<sub>1</sub> ( $6.0 \times 10^{-5}$  M), (b) 395 nm of **Bt**<sub>2</sub> ( $3.0 \times 10^{-5}$  M), (c) 355 nm of **Tt**<sub>1</sub> ( $3.0 \times 10^{-5}$  M), and (d) 395 nm of **Tt**<sub>2</sub> ( $3.0 \times 10^{-5}$  M) was plotted against the pH of the solution (v/v Buffer:DMSO 2:1).

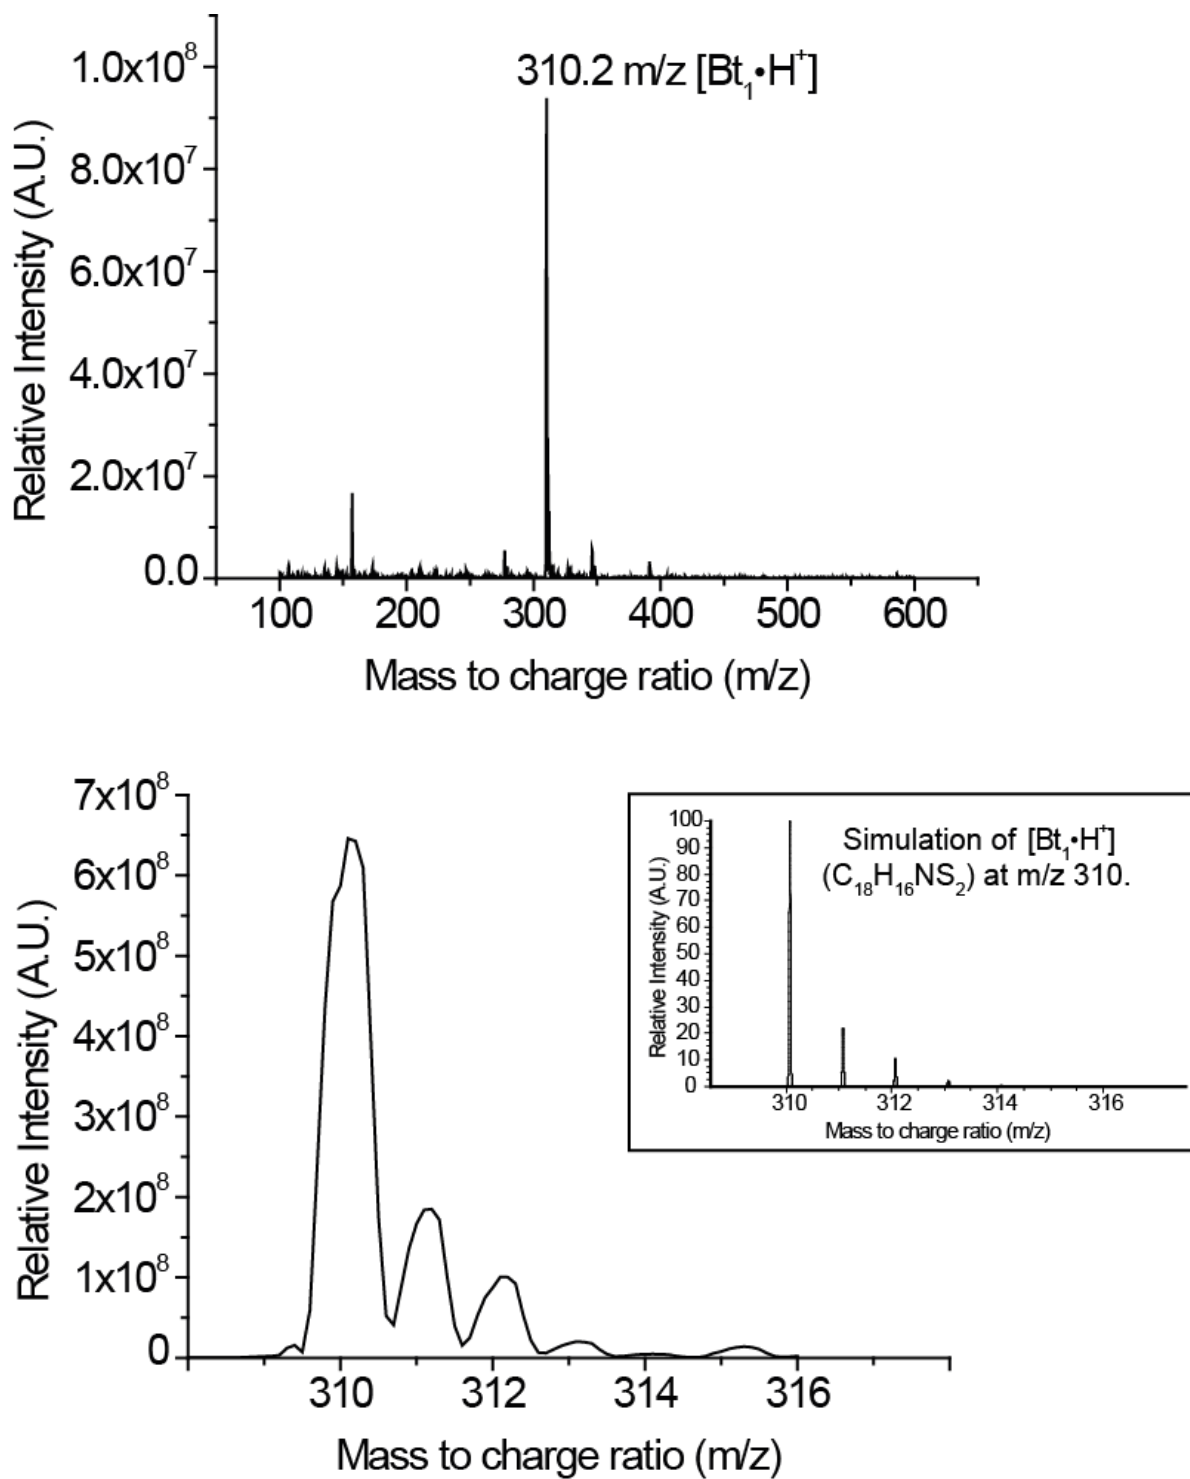

**S. Fig 2. (upper)** Electrospray mass spectra of  $\text{Bt}_1$ . **(lower)** Isotopic distribution and **(inset)** its simulation of  $[\text{Bt}_1 \cdot \text{H}^+]$  peak at 310. All the mass spectra were performed in acetonitrile with 0.1% acetic acid.

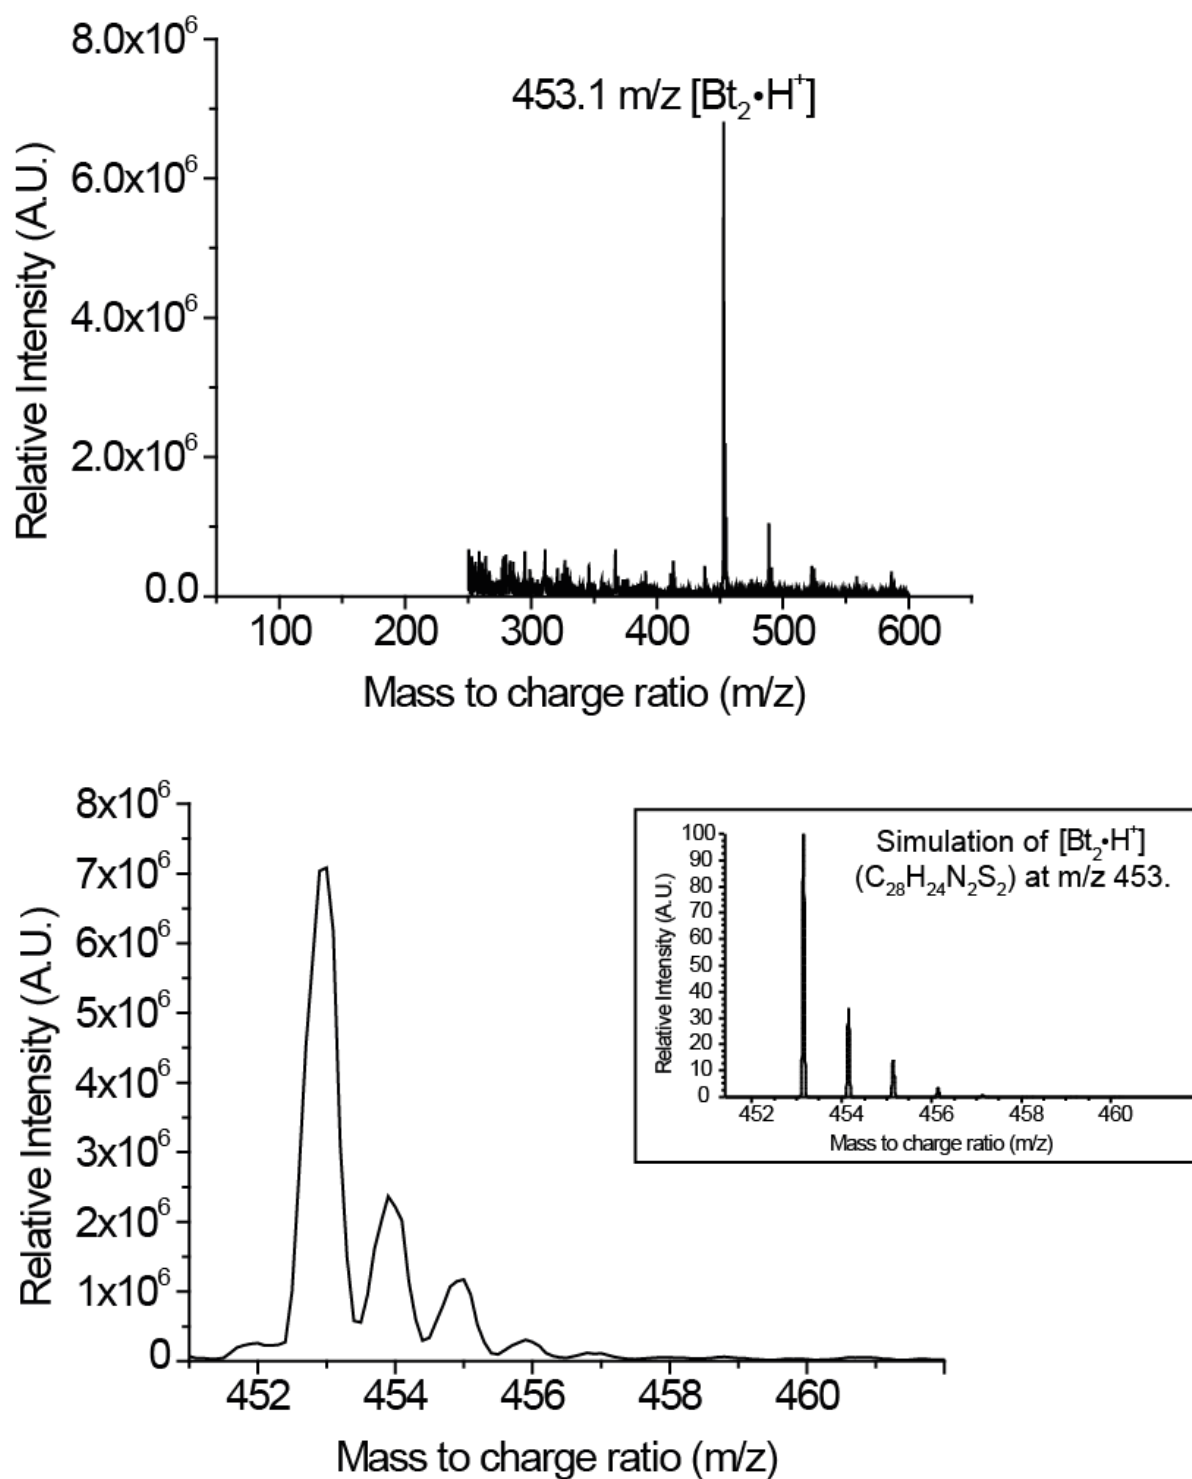

**S. Fig 3. (upper)** Electrospray mass spectra of  $Bt_2$ . **(lower)** Isotopic distribution and **(inset)** its simulation of  $[Bt_2 \cdot H^+]$  peak at 453. All the mass spectra were performed in acetonitrile with 0.1% acetic acid.

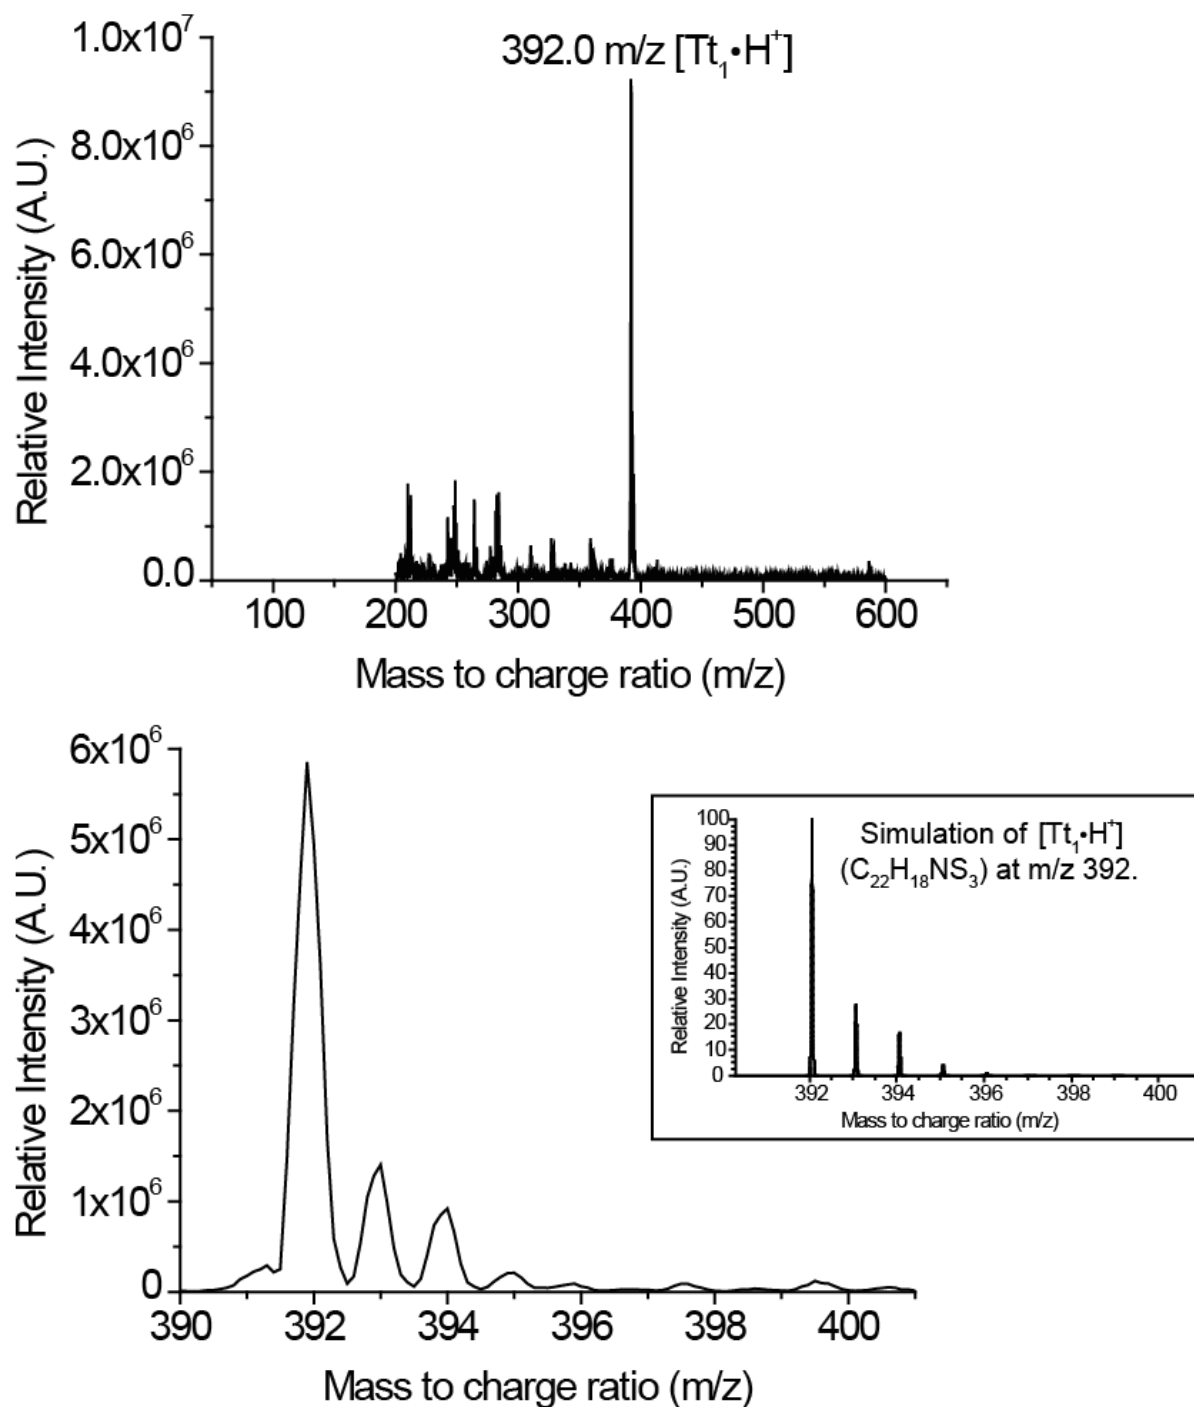

**S. Fig 4. (upper)** Electrospray mass spectra of  $\text{Tt}_1$ . **(lower)** Isotopic distribution and **(inset)** its simulation of  $[\text{Tt}_1 \cdot \text{H}^+]$  peak at 392. All the mass spectra were performed in acetonitrile with 0.1% acetic acid.

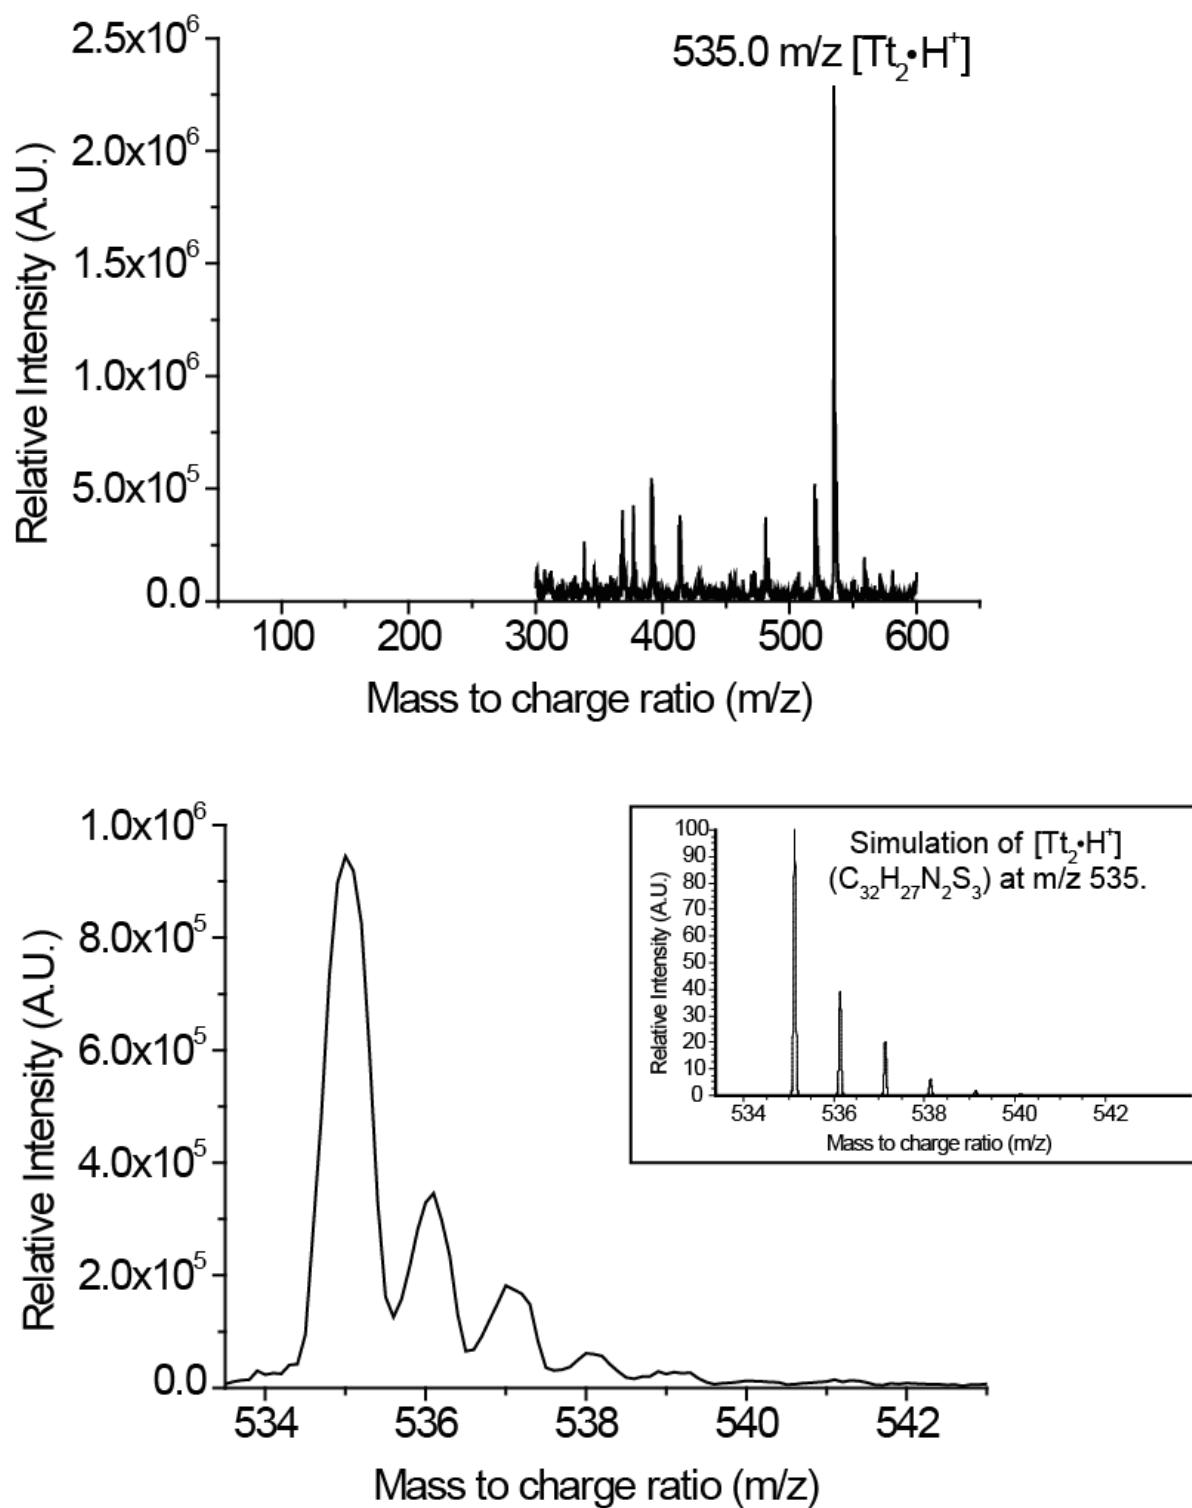

**S. Fig 5. (upper)** Electrospray mass spectra of  $Tt_2$ . **(lower)** Isotopic distribution and **(inset)** its simulation of  $[Tt_2 \cdot H^+]$  peak at 535. All the mass spectra were performed in acetonitrile with 0.1% acetic acid.

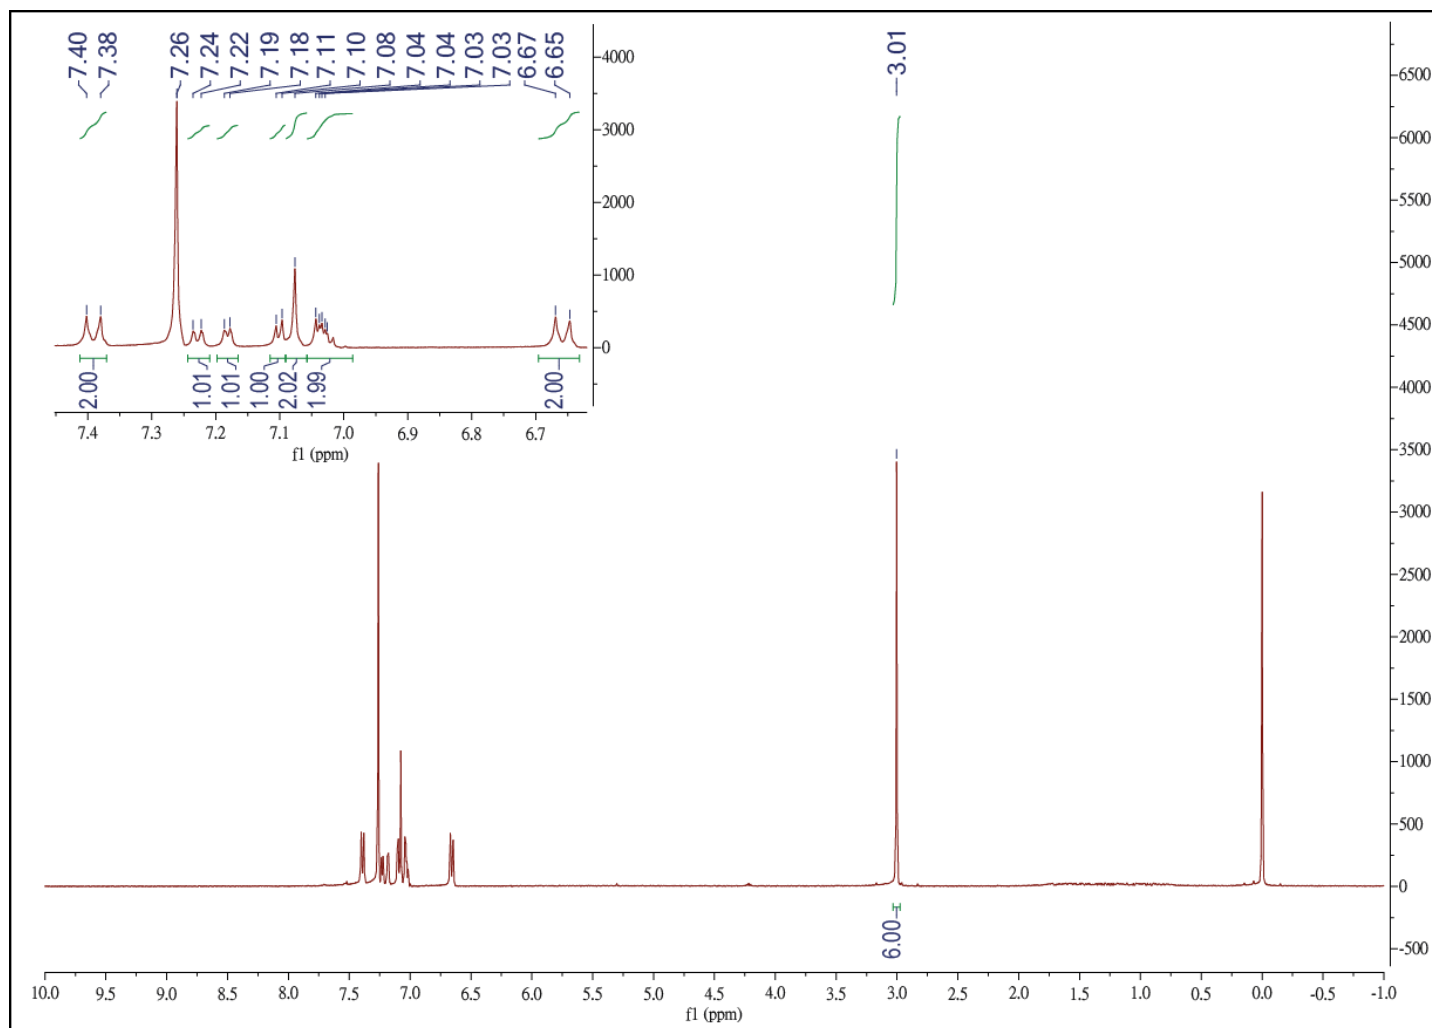

S. Fig. 6.  $^1\text{H-NMR}$  spectrum of  $\text{Tt}_1$  (400 MHz,  $\text{CDCl}_3$ ).

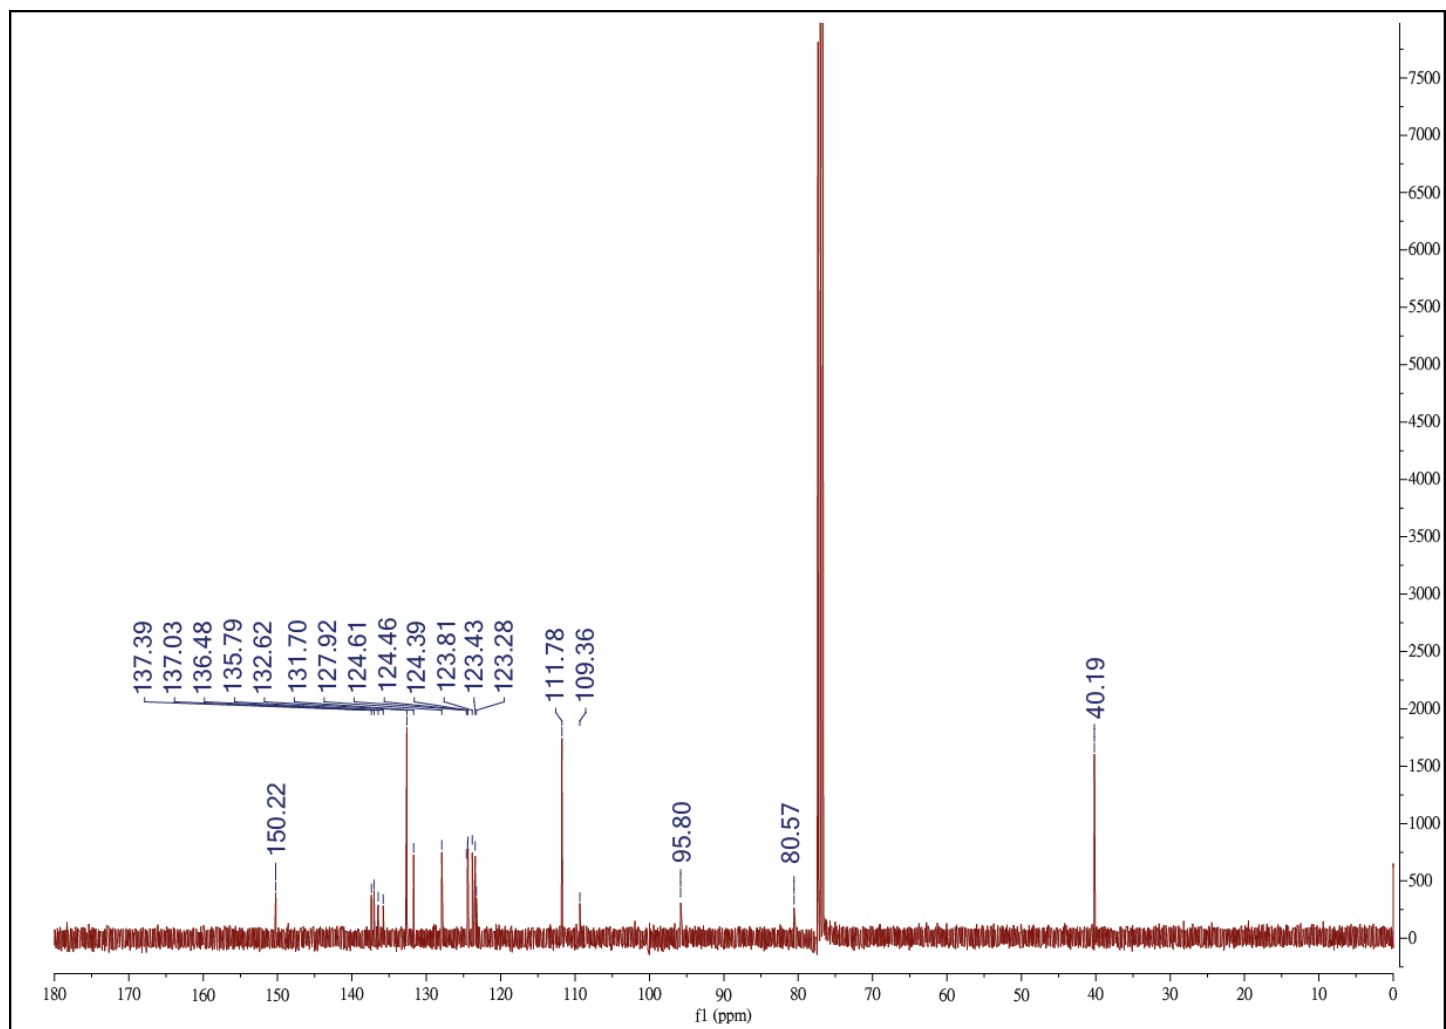

S. Fig. 7.  $^{13}\text{C}$ -NMR spectrum of  $\text{Tt}_1$  (400 MHz,  $\text{CDCl}_3$ ).



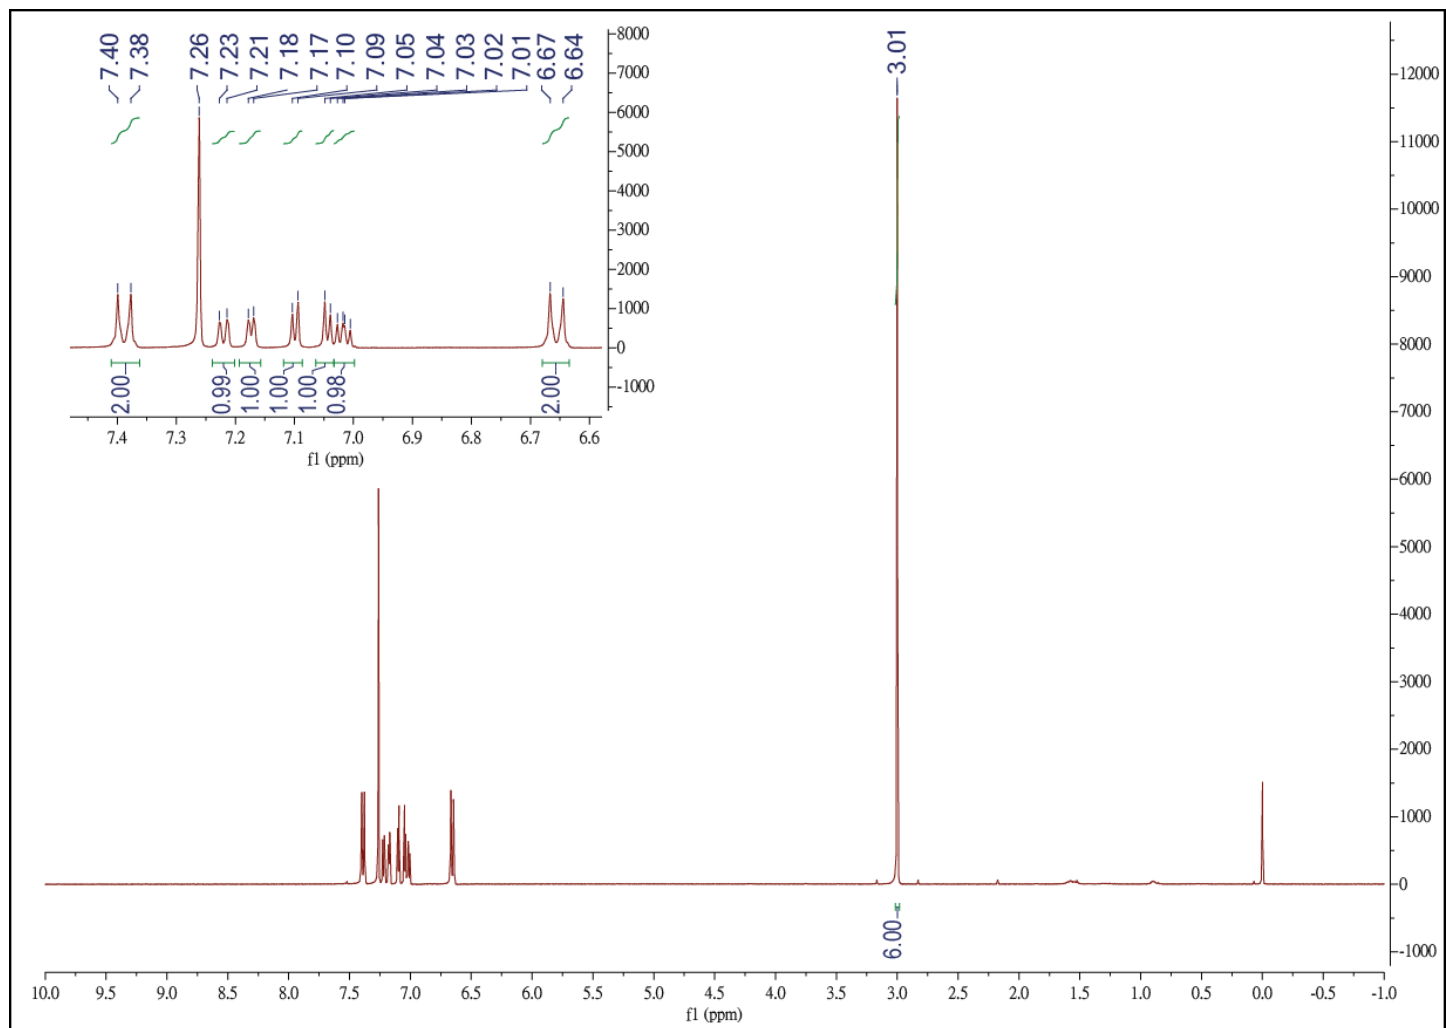

S. Fig. 8.  $^1\text{H-NMR}$  spectrum of **Bt**<sub>1</sub> (400 MHz,  $\text{CDCl}_3$ ).

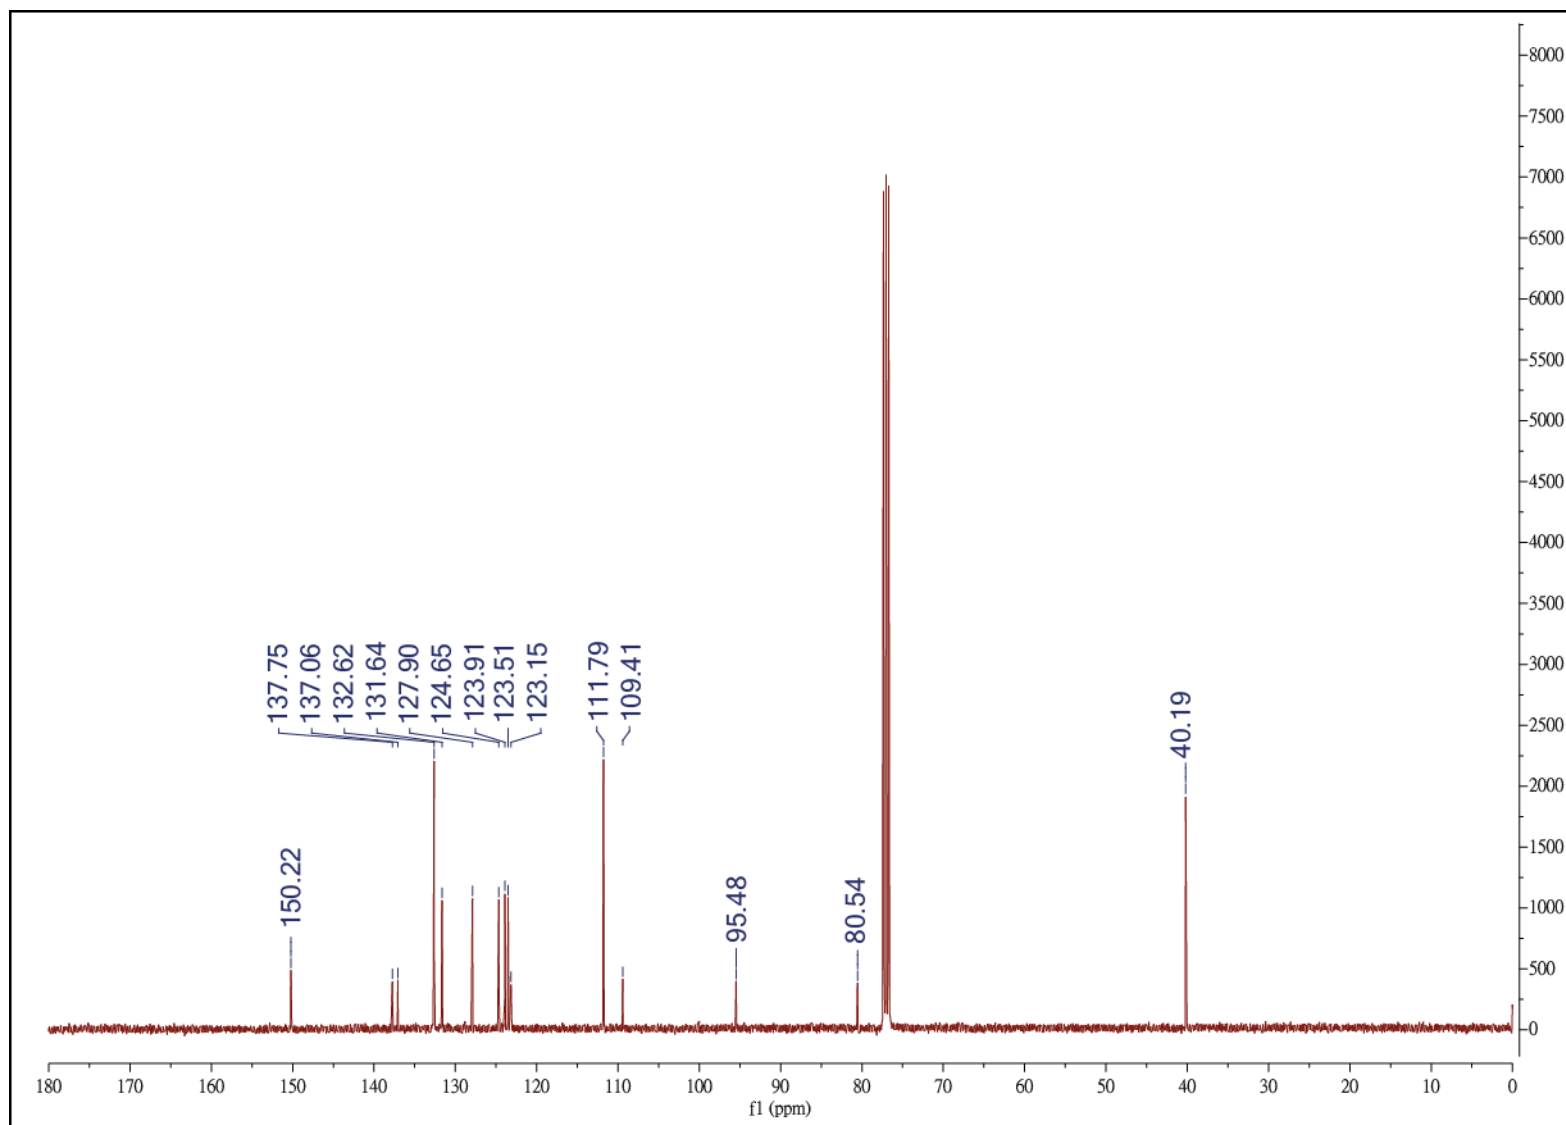

S. Fig. 9.  $^{13}\text{C}$ -NMR spectrum of  $\text{Bt}_1$  (400 MHz,  $\text{CDCl}_3$ ).

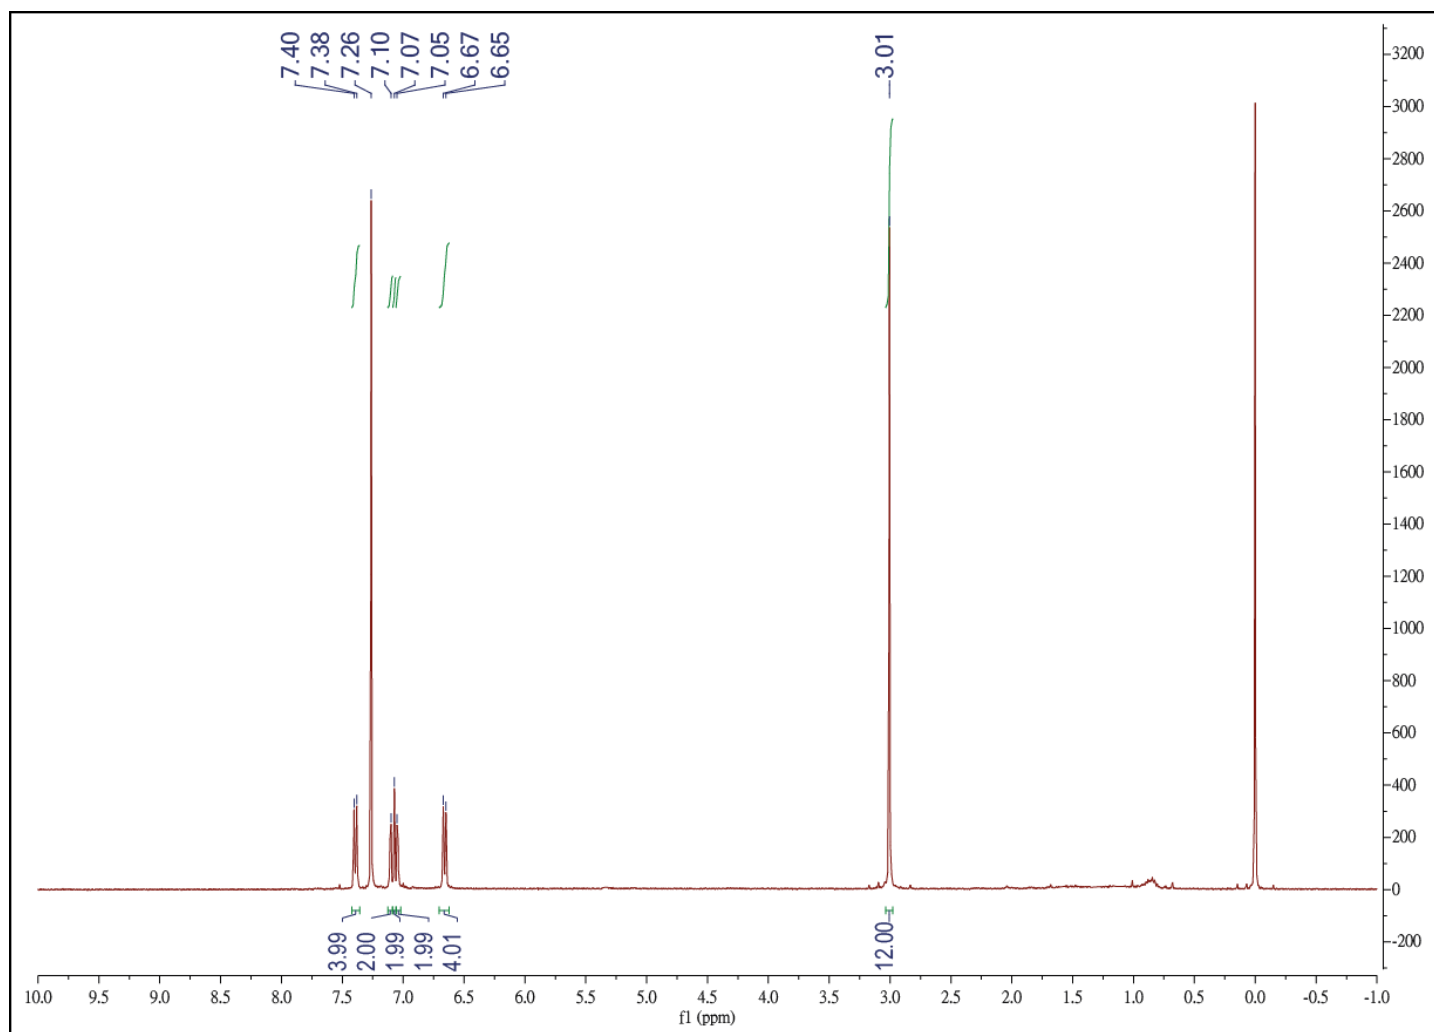

S. Fig. 10. <sup>1</sup>H-NMR spectrum of **Tt**<sub>2</sub> (400 MHz, CDCl<sub>3</sub>).

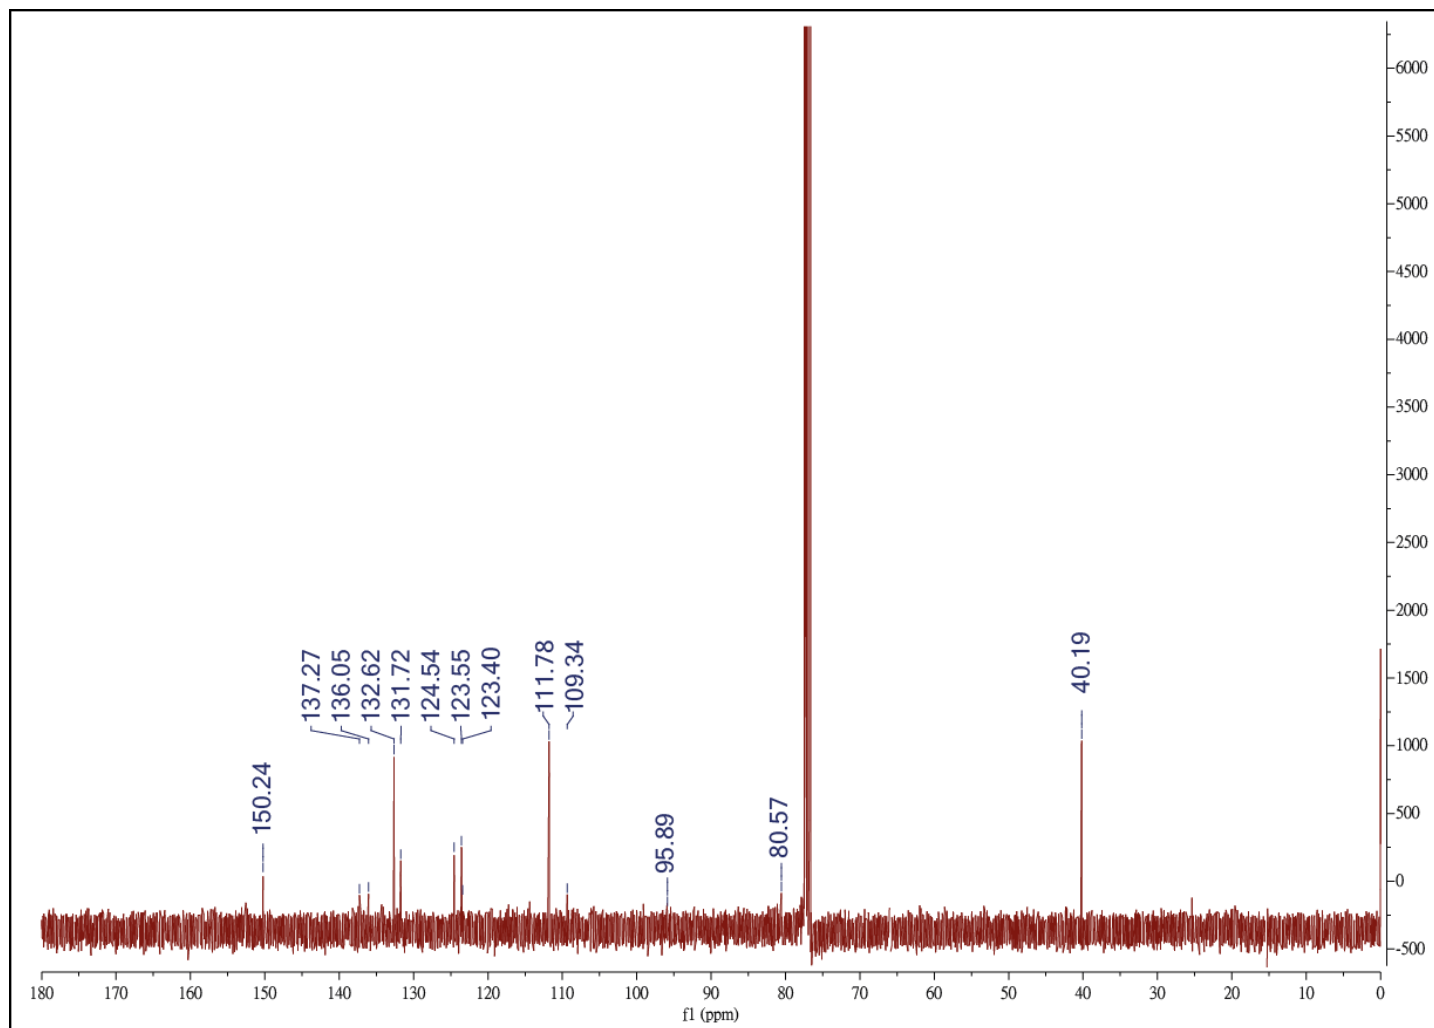

S. Fig. 11.  $^{13}\text{C}$ -NMR spectrum of  $\text{Tt}_2$  (400 MHz,  $\text{CDCl}_3$ ).

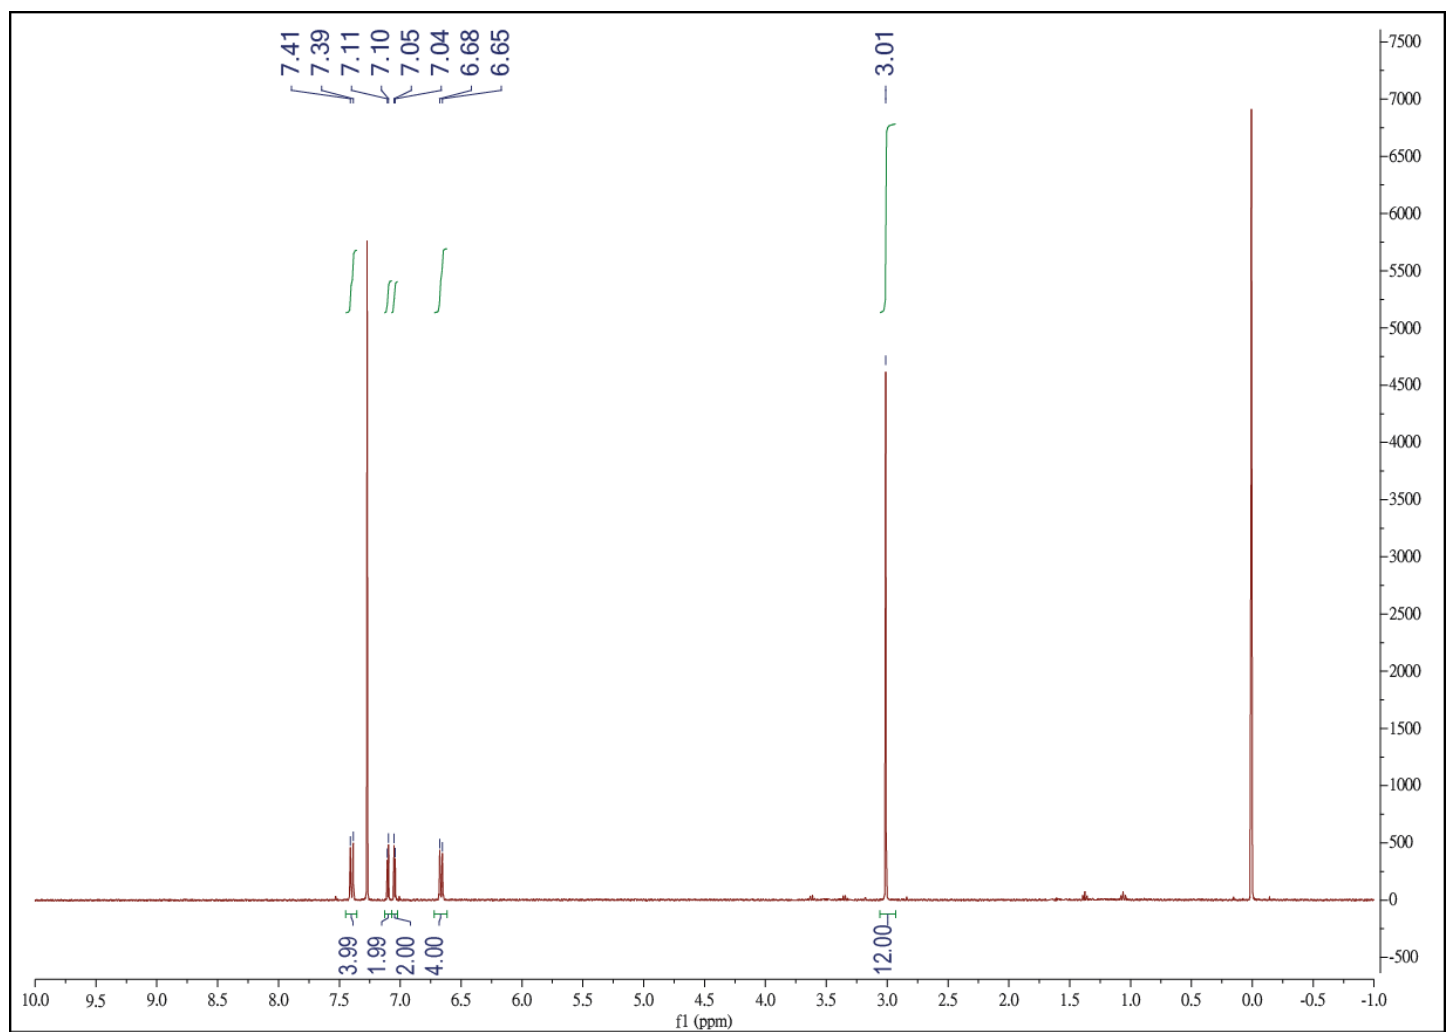

S. Fig. 12. <sup>1</sup>H-NMR spectrum of **Bt**<sub>2</sub> (400 MHz, CDCl<sub>3</sub>).

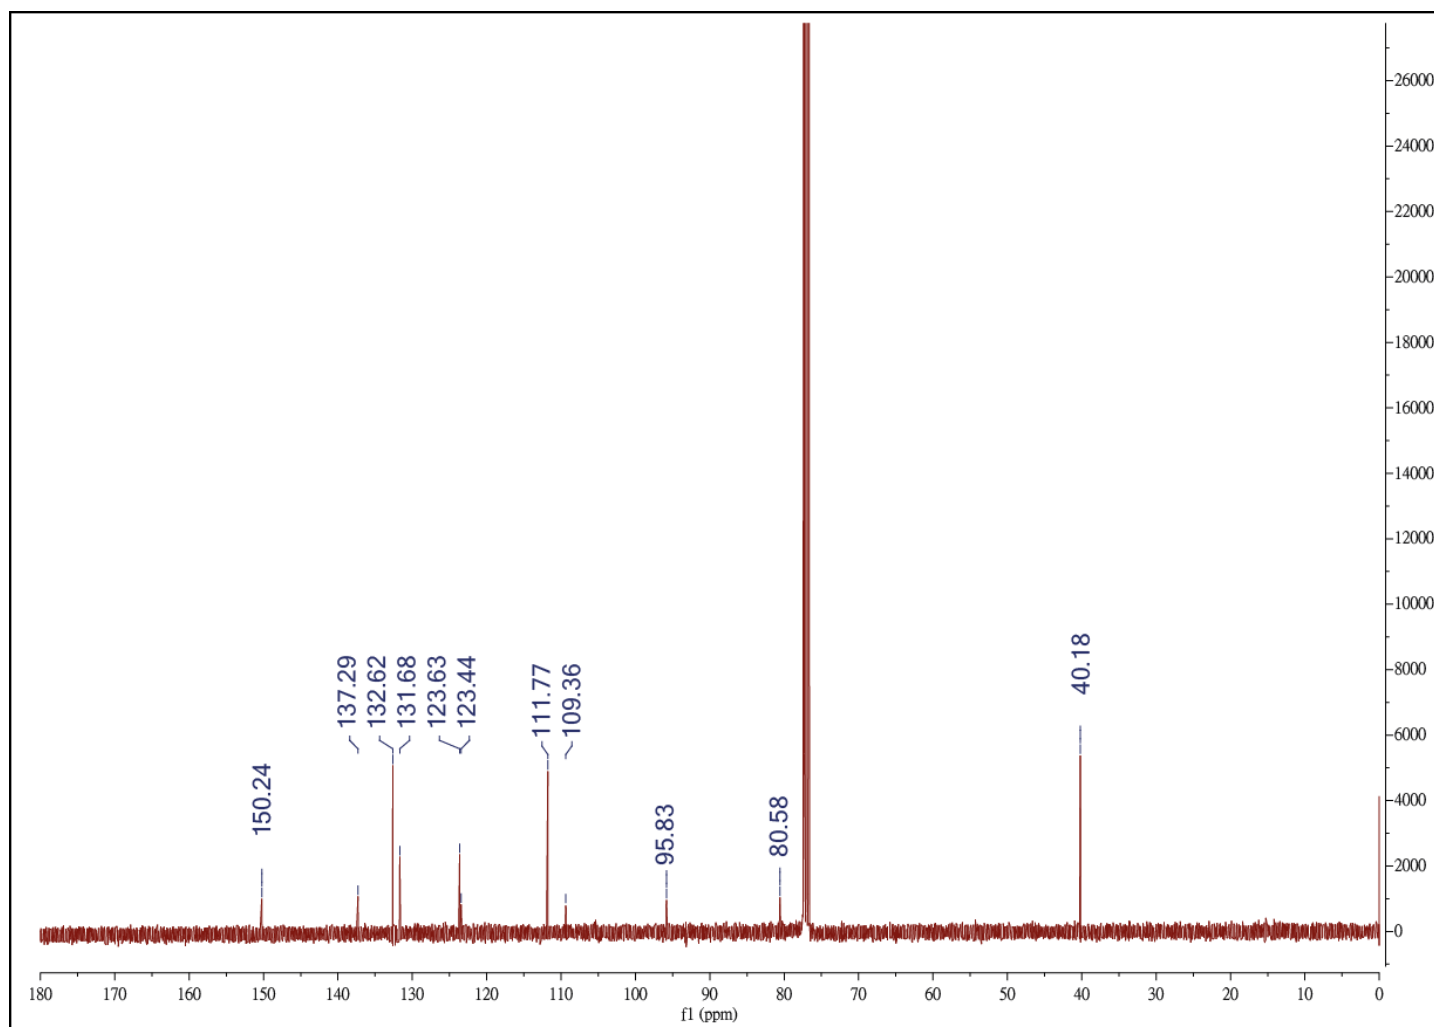

S. Fig. 13. <sup>13</sup>C-NMR spectrum of **Bt**<sub>2</sub> (400 MHz, CDCl<sub>3</sub>).
